# Supplementary material for: A systematic review of the implementation and impact of asthma protocols
Source: Springer Nature journal article supplement (doi:10.1186/1472-6947-14-82), 2014-09-09

Identification

Screening

Eligibility

Included

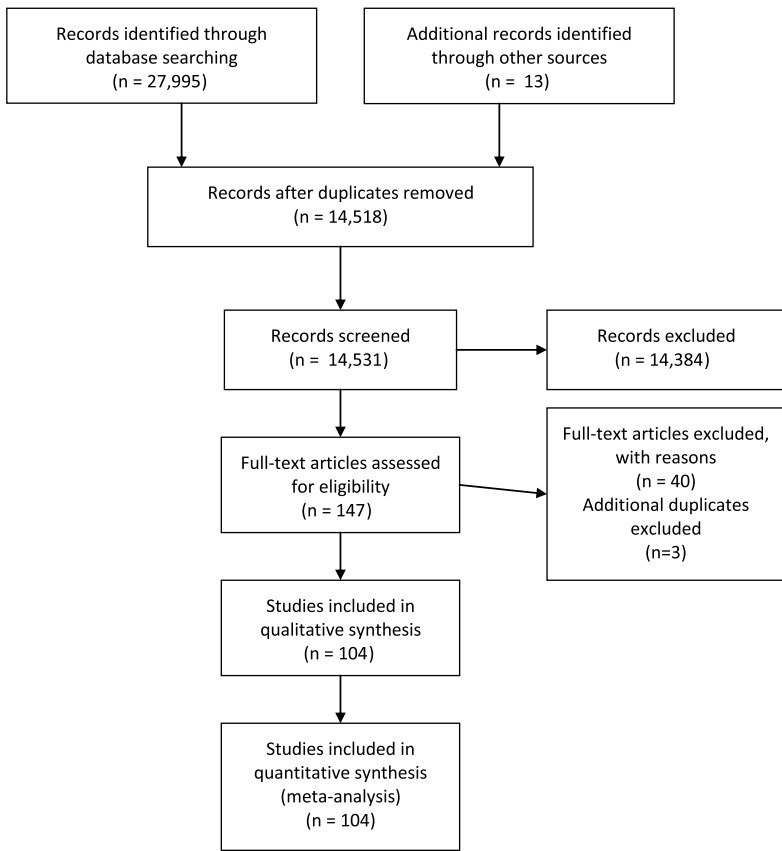

Supplement: 12911_2013_846_MOESM1_ESM.pdf [file 12911_2013_846_MOESM1_ESM.pdf]
